# Supplementary material for: Modeling coupled nitrification-denitrification in soil with an organic hotspot
Source: Copernicus journal article supplement (doi:10.5194/bg-2023-98), 2023-06-13
Supplement: Supplementary file 1 [file bg-2023-98-supplement.pdf]

# Supporting information

## Modeling coupled nitrification-denitrification in soil with an organic hotspot

Jie Zhang, et al.

### S1. Initial conditions in the model

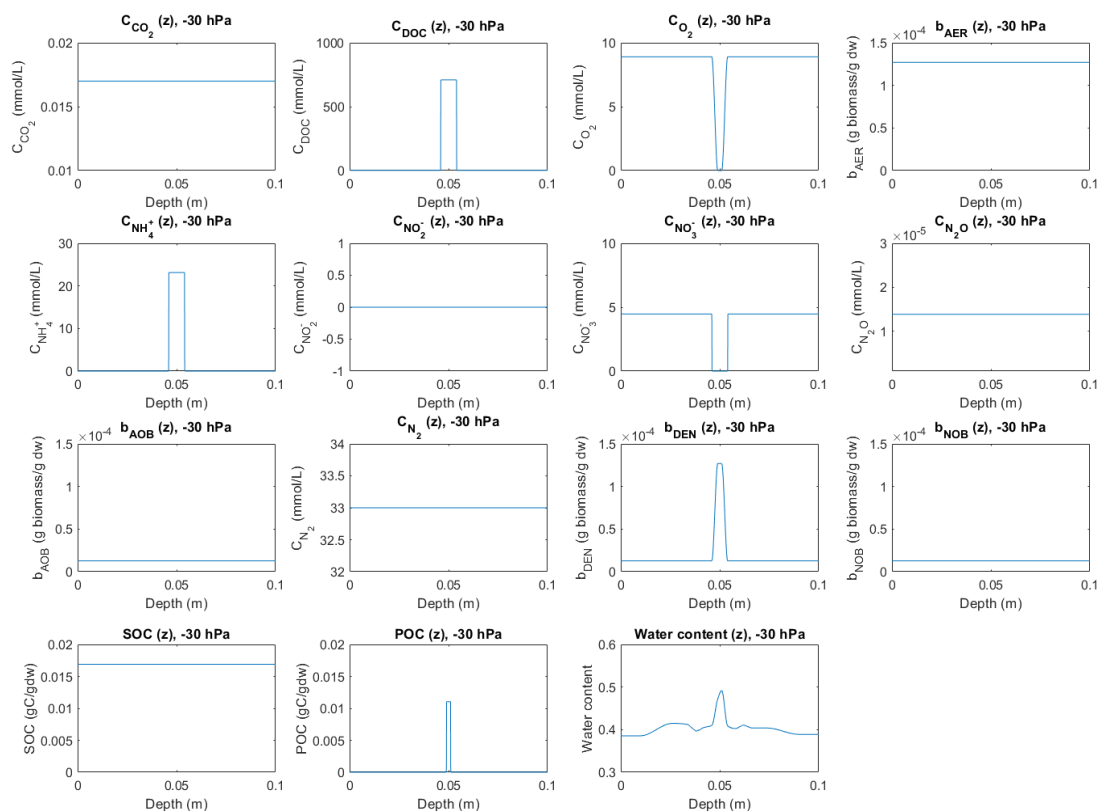

5

Figure S1.1. Initial values for non-uniformly distributed components and soil moisture in the -30 hPa treatment.

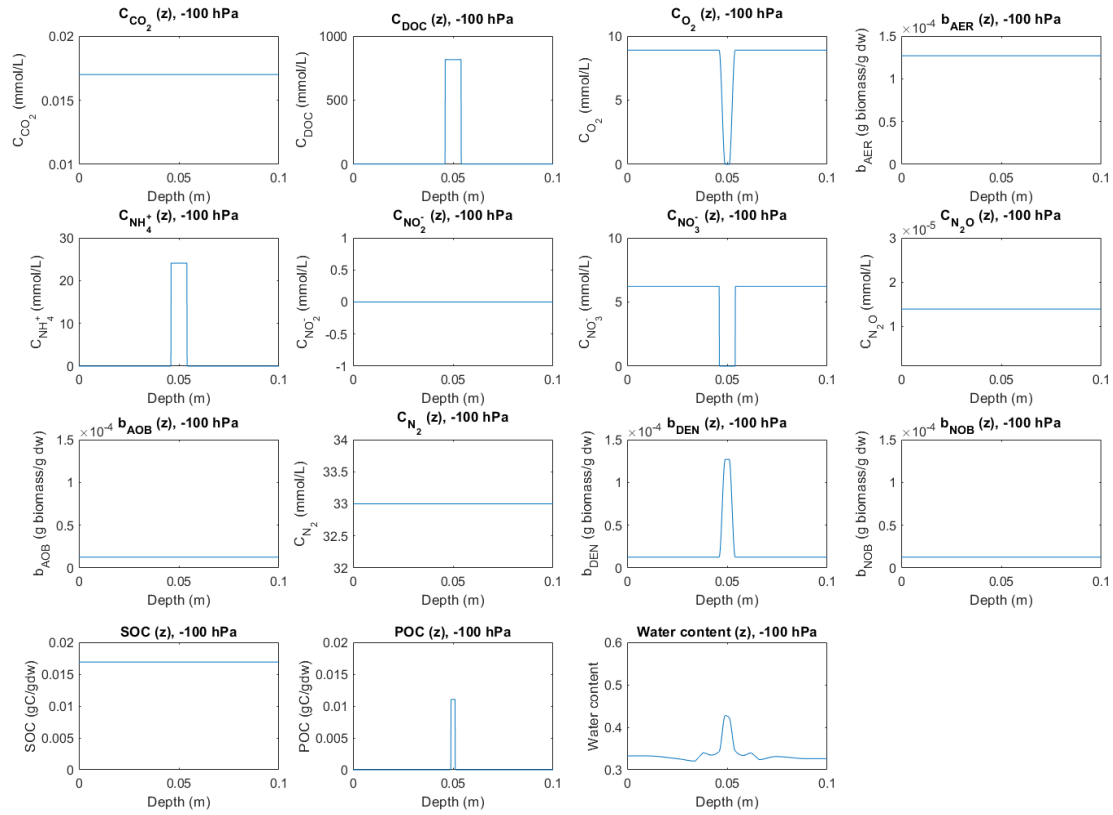

Figure S1.2. Initial values for non-uniformly distributed components and soil moisture in the -100 hPa treatment.

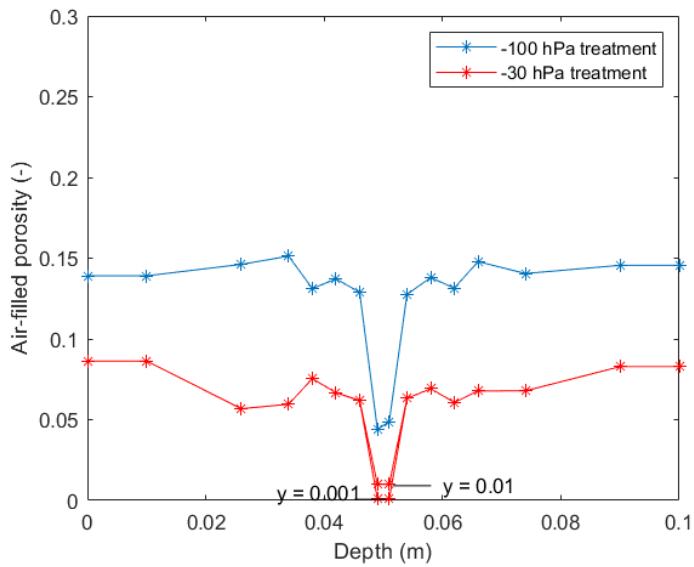

Figure S1.3. Air-filled porosity in the -30 hPa and -100 hPa treatments.

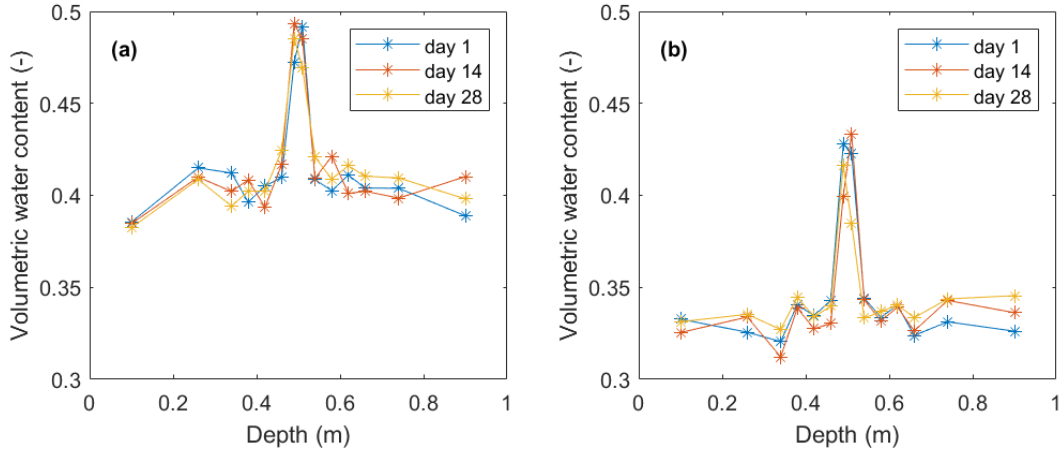

Figure S1.4. Volumetric water-filled porosity in (a) -30 hPa and (b) -100 hPa treatments.

## S2. Simulated concentration profiles

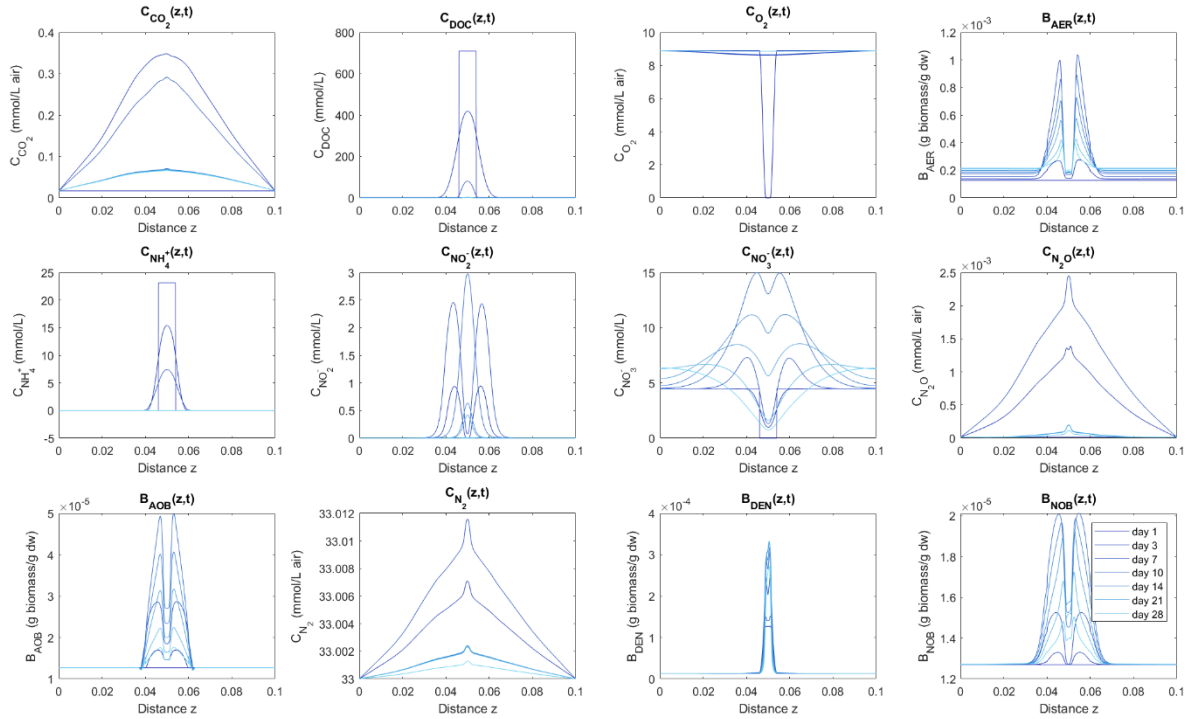

5

Figure S2.1. Simulated concentration profiles of 12 species numerically solved in the model for the -30 hPa treatment. Data are plotted on day 0, 1, 3, 7, 10, 14, 21, 28 where lighter colors indicates the increasing time.

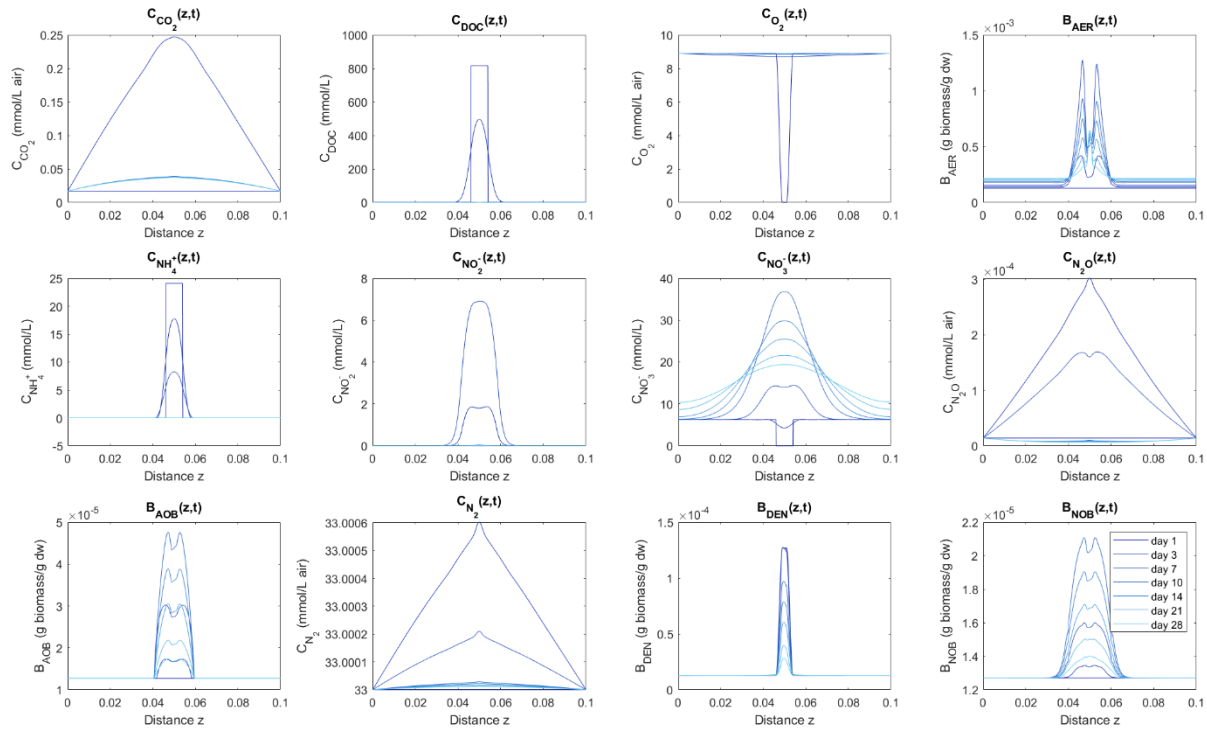

Figure S2.2. Simulated concentration profiles of 12 species numerically solved in the model for the -100 hPa treatment. Data are plotted on day 0, 1, 3, 7, 10, 14, 21, 28 where lighter colors indicates the increasing time.

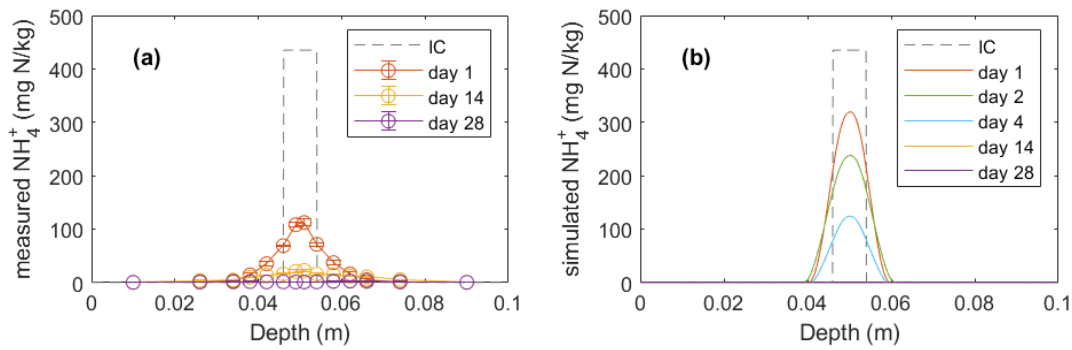

Figure S2.3. Measured and modeled  $\text{NH}_4^+$  profiles in the -30 hPa treatment.

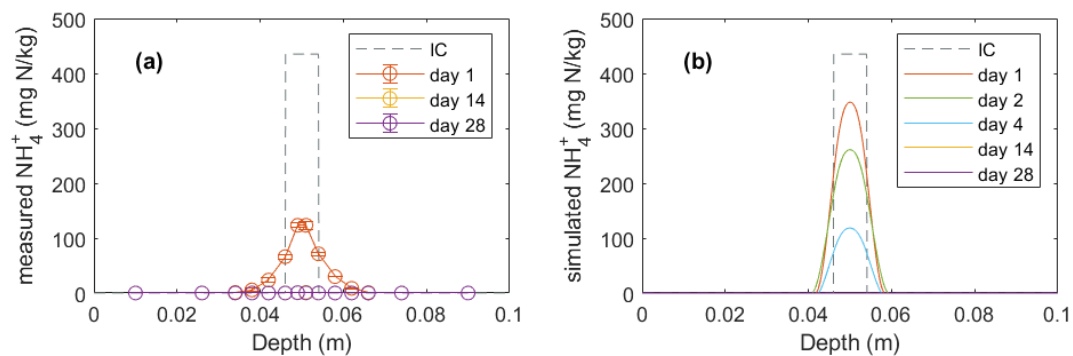

Figure S2.4. Measured and modeled  $\text{NH}_4^+$  profiles in the -100 hPa treatment.

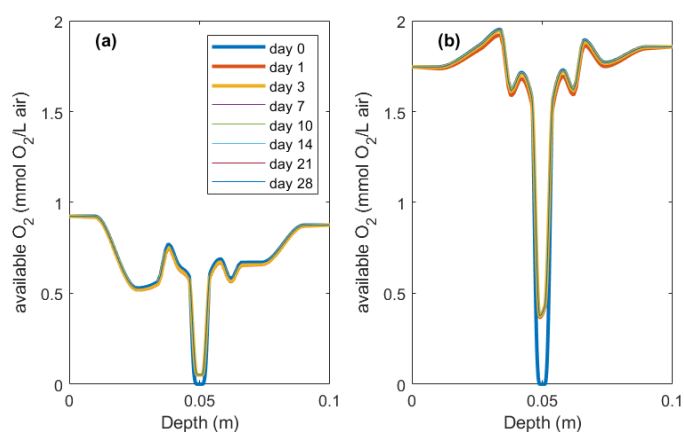

Figure S2.5. Simulated available  $\text{O}_2$  content in model reactions in (a) -30 hPa and (b) -100 hPa treatments.

5

Table S1.1 Basic properties of the manure slurry. TOC was assumed to account for a fraction of 0.42 of VS (Petersen et al., 2016) and the fraction of DOC in TOC was 0.5, an intermediate estimate from two studies (Petersen et al., 1996, 2016).

| Application rate<br>(kg fw/m <sup>2</sup> ) | Volatile solids<br>(g VS/kg fw) | TOC<br>(g C/kg fw) | DOC<br>(g C/kg fw) | POC<br>(g C/kg fw) | $\text{NH}_4^+$<br>(g N/kg fw) | Dry matter<br>(g/kg fw) |
|---------------------------------------------|---------------------------------|--------------------|--------------------|--------------------|--------------------------------|-------------------------|
| 3.963                                       | 37.14                           | 15.60              | 7.8                | 7.8                | 1.23                           | 48.04                   |

10 Table S1.2 Average measured values of soil samples taken at a distance of 1 cm from both surfaces in control treatments on day 1. SOC was estimated from LOI and the conversion model in (Jensen et al., 2018).

| LOI<br>(g/100 g dw) | SOC<br>(g/100 g dw) | $\text{NH}_4^+$<br>(mg N/kg dw) | $\text{NO}_3^-$<br>(mg N/kg dw) |
|---------------------|---------------------|---------------------------------|---------------------------------|
|---------------------|---------------------|---------------------------------|---------------------------------|

|               |      |      |       |       |
|---------------|------|------|-------|-------|
| -30 hPa soil  | 5.09 | 1.69 | 0.090 | 17.86 |
| -100 hPa soil | 5.06 | 1.70 | 0.138 | 20.54 |

### S3. Reactive and diffusional rates of $N_2O$ , $NO_2^-$ , $CO_2$ , and $O_2$

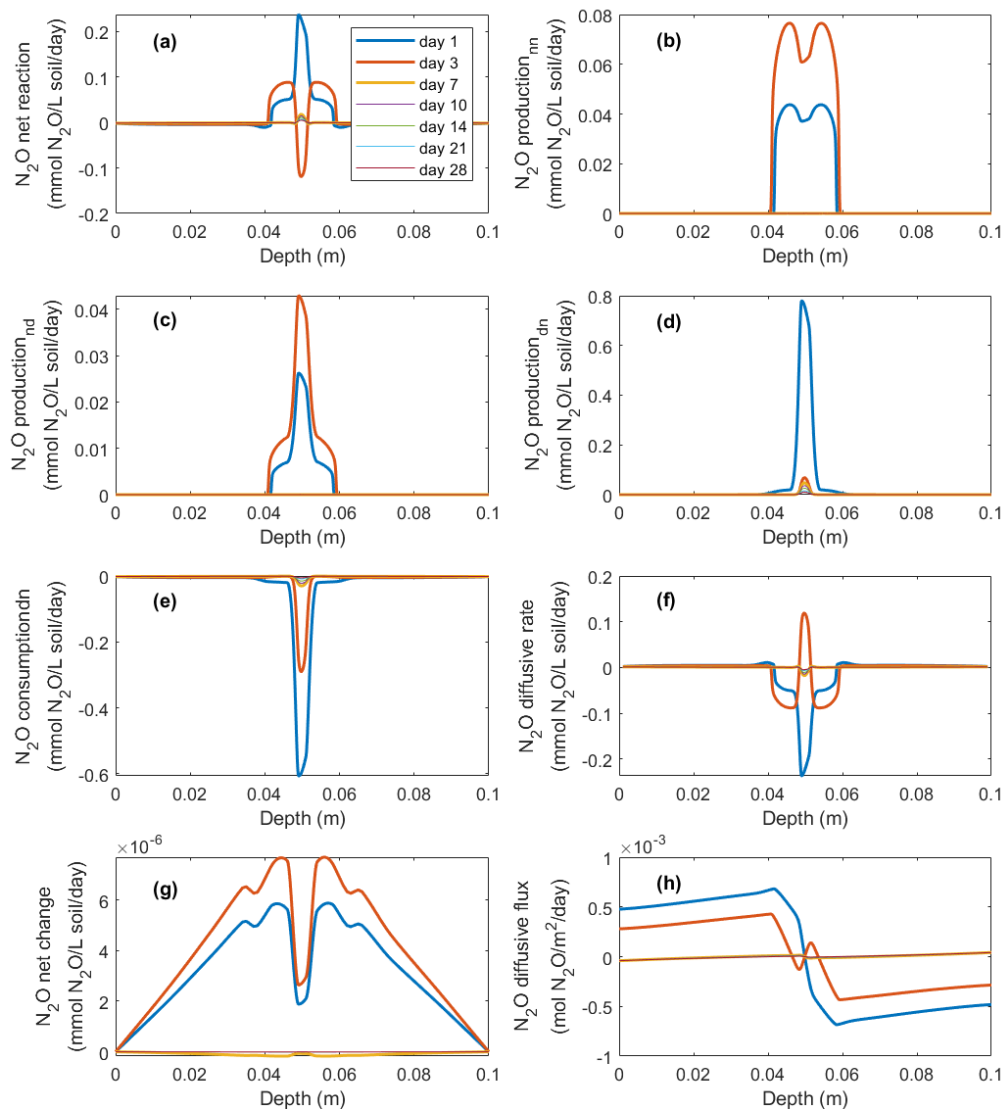

5 Figure S3.1. Simulated  $N_2O$  production rate via nitrification (nn), nitrifier denitrification (nd), and denitrification (dn), respectively;  $N_2O$  reduction rate *via* denitrification (dn); and  $N_2O$  change rate *via* diffusion in the -100 hPa treatment. In panel (h), negative sign indicates the direction towards right (bottom) and positive sign indicates the direction towards left (top) of the soil core.

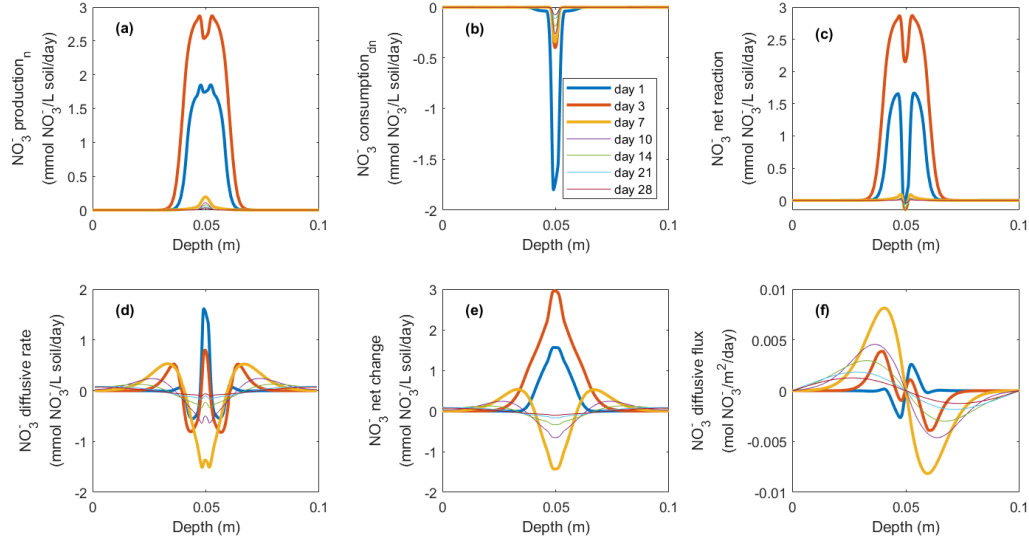

Figure S3.2. Simulated individual  $\text{NO}_3^-$  reaction rates, diffusive rate, net change rate, and diffusive flux in the -100 hPa treatment. In panel (f), the negative sign represents the downward flow towards the lower soil-air interface ( $z = 0.1$  m), and the positive sign the flow towards the upper soil-air interface ( $z = 0$  m).

5

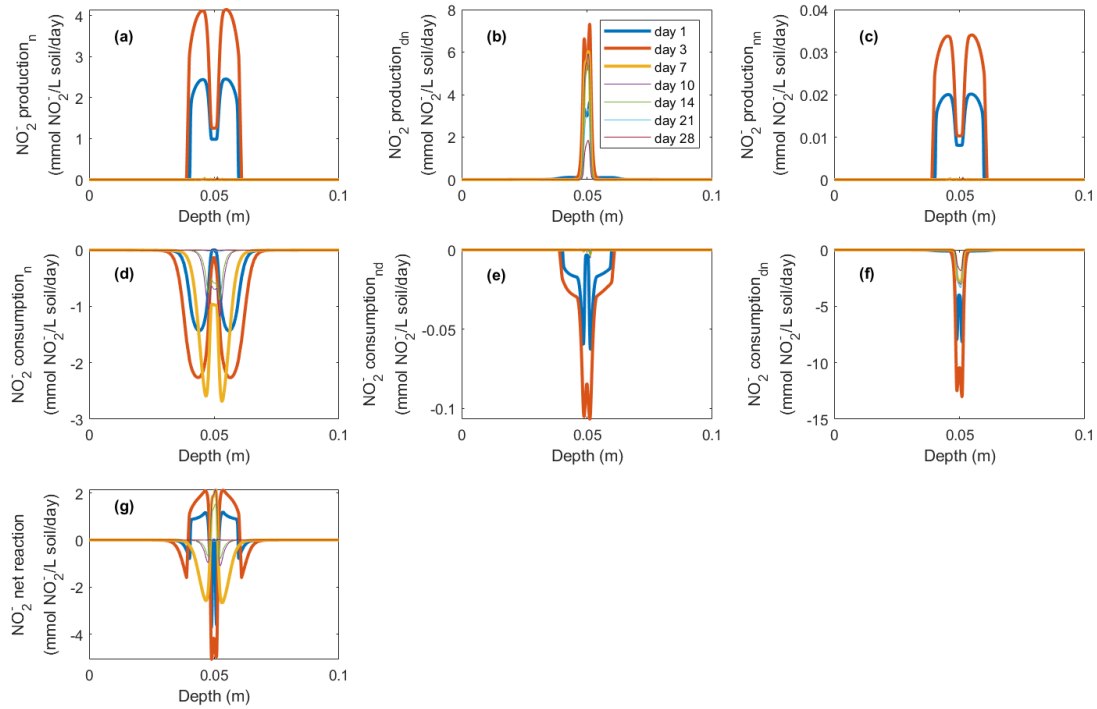

Figure S3.3. Simulated rates of  $\text{NO}_2^-$  production, consumption, and net rate in the -30 hPa treatment.

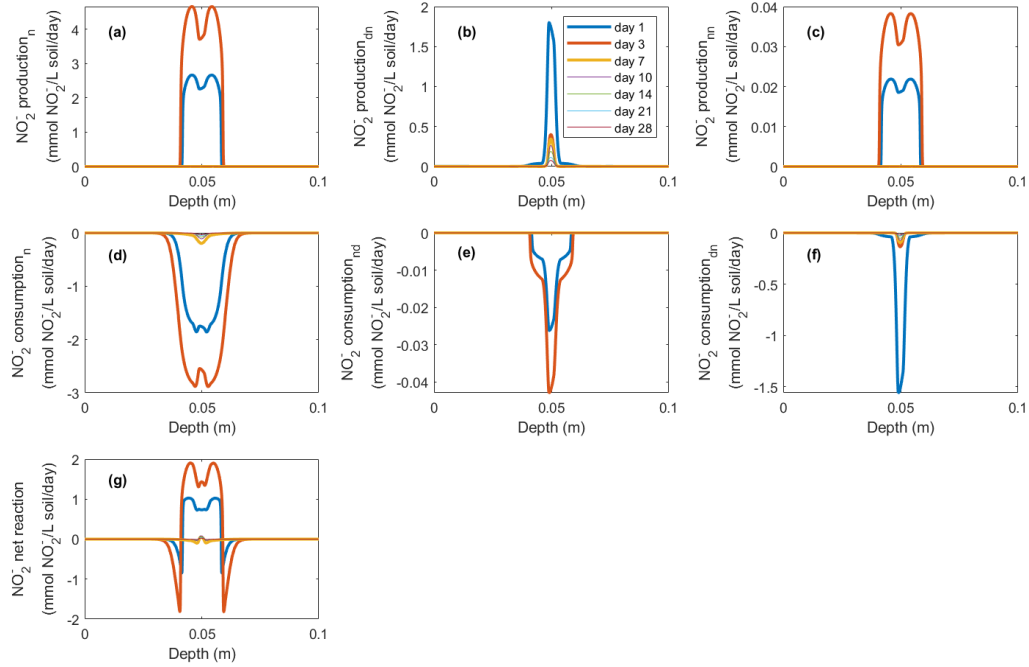

Figure S3.4. Simulated rates of  $\text{NO}_2^-$  production, consumption, and net rate in the -100 hPa treatment.

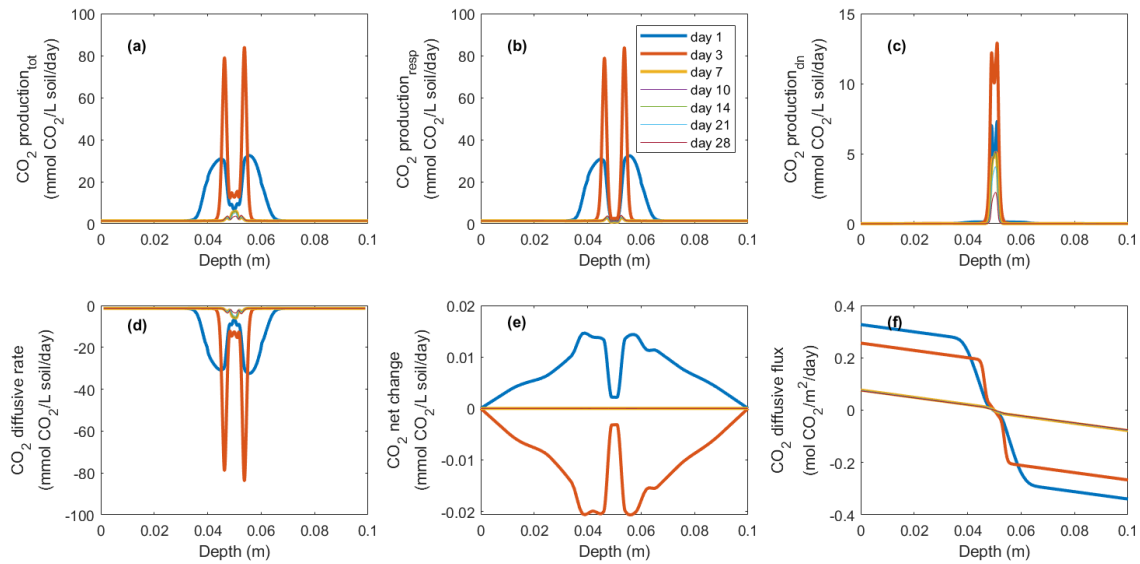

5 Figure S3.5. Simulated  $\text{CO}_2$  production rates from aerobic respiration and anaerobic respiration by denitrifiers in the -30 hPa treatment.



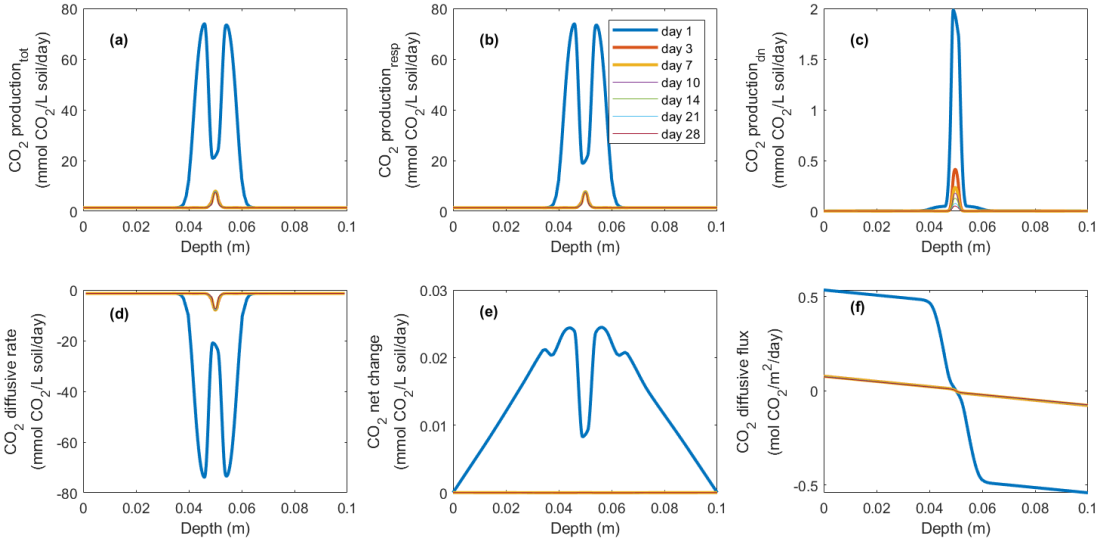

Figure S3.6. Simulated CO<sub>2</sub> production rates from aerobic respiration and anaerobic respiration by denitrifiers in the -100 hPa treatment.

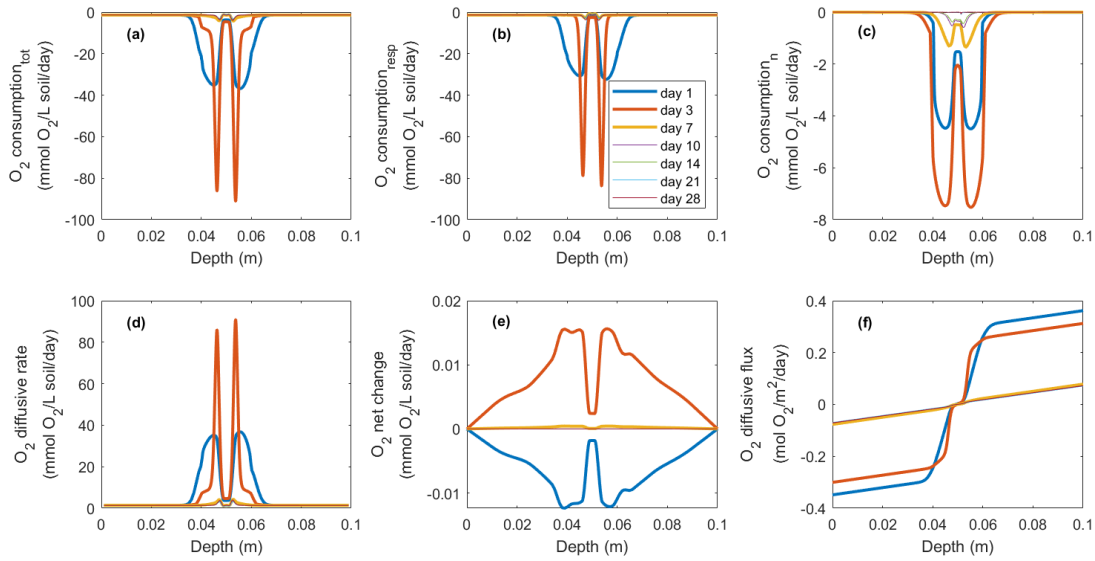

5 Figure S3.7. Simulated O<sub>2</sub> consumption rates by aerobic respiration and nitrification in the -30 hPa treatment.

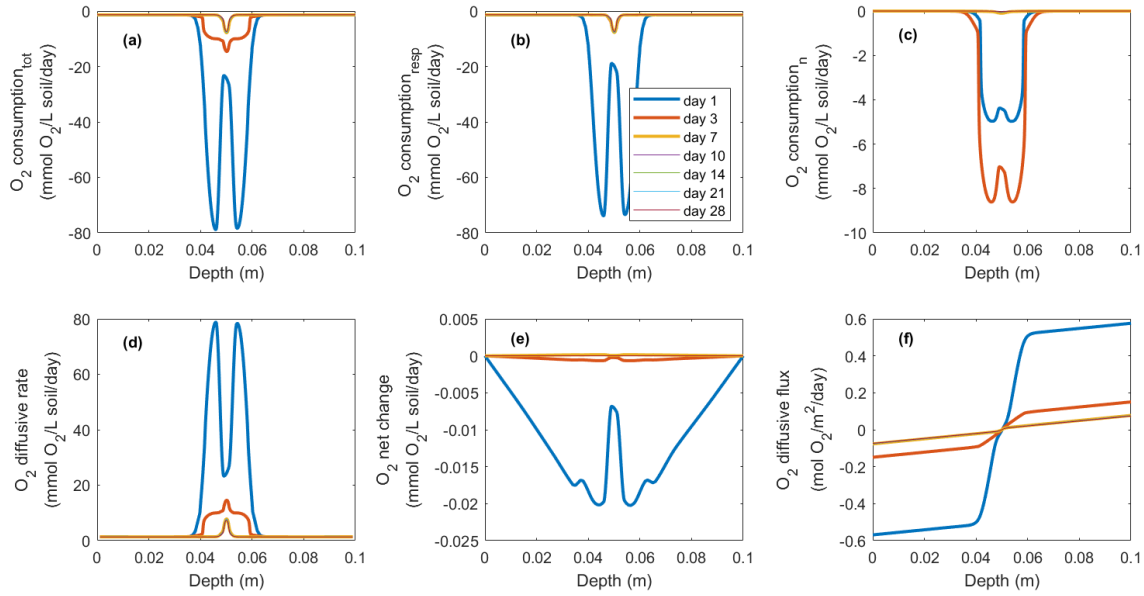

Figure S3.8. Simulated O<sub>2</sub> consumption rates by aerobic respiration and nitrification in the -100 hPa treatment.

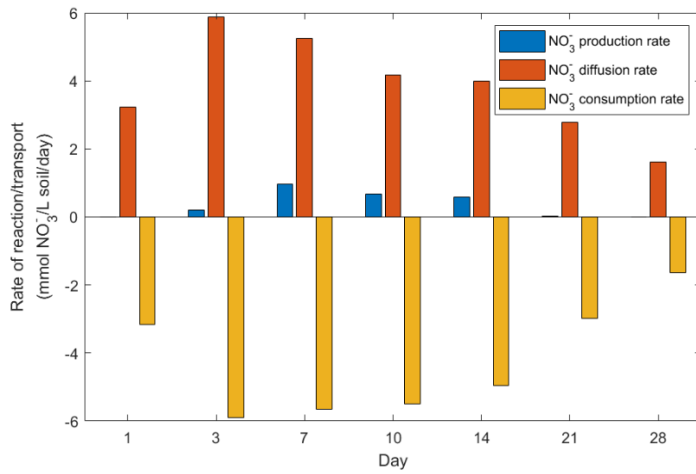

Figure S3.9. Average rates of NO<sub>3</sub><sup>-</sup> production, diffusion, and consumption between 0.049-0.051 m in the simulation of the -30 hPa treatment.

5

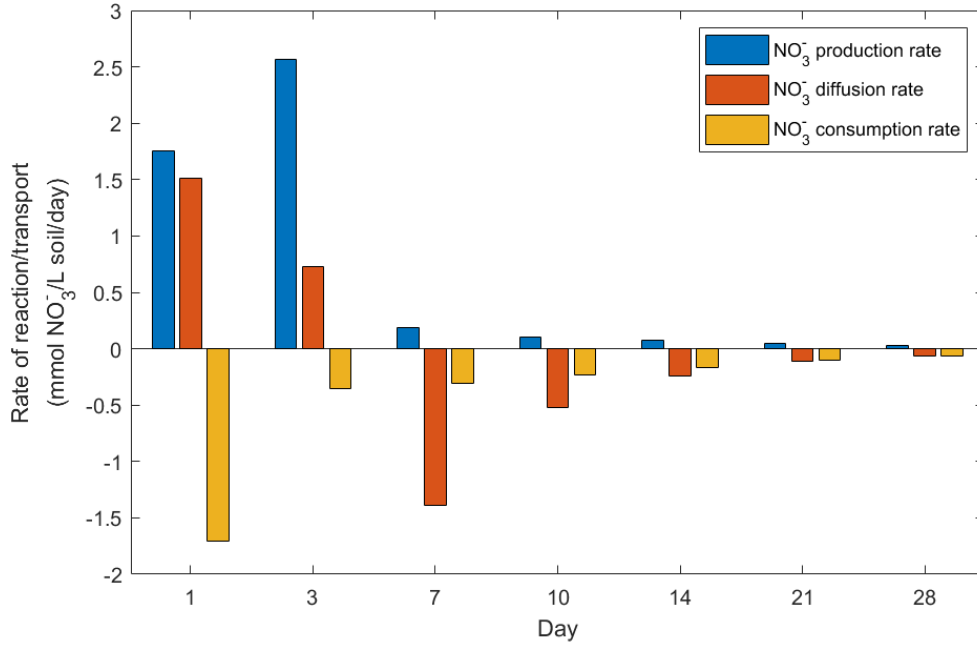

Figure S3.10. Average rates of  $\text{NO}_3^-$  production, diffusion, and consumption between 0.049-0.051 m in the simulation of the -100 hPa treatment.

5 S4. Scenario test: no solute diffusion

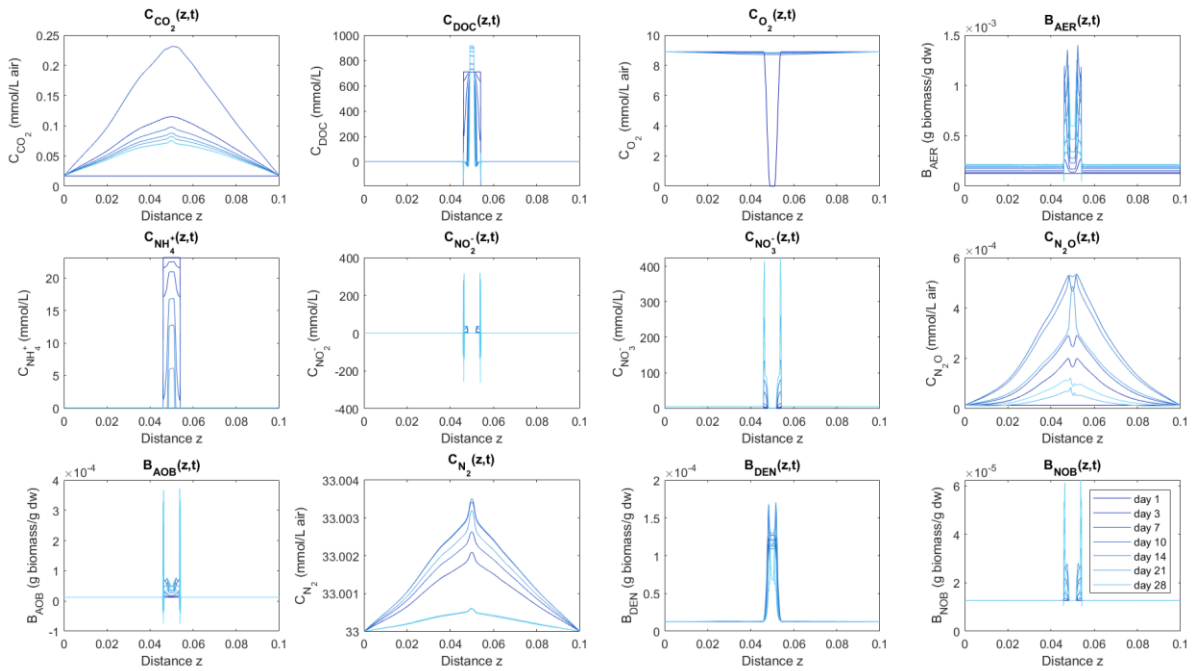

Figure S4.1. Simulated concentration profiles of 12 species numerically solved in the model for the -30 hPa treatment, without solute diffusion.

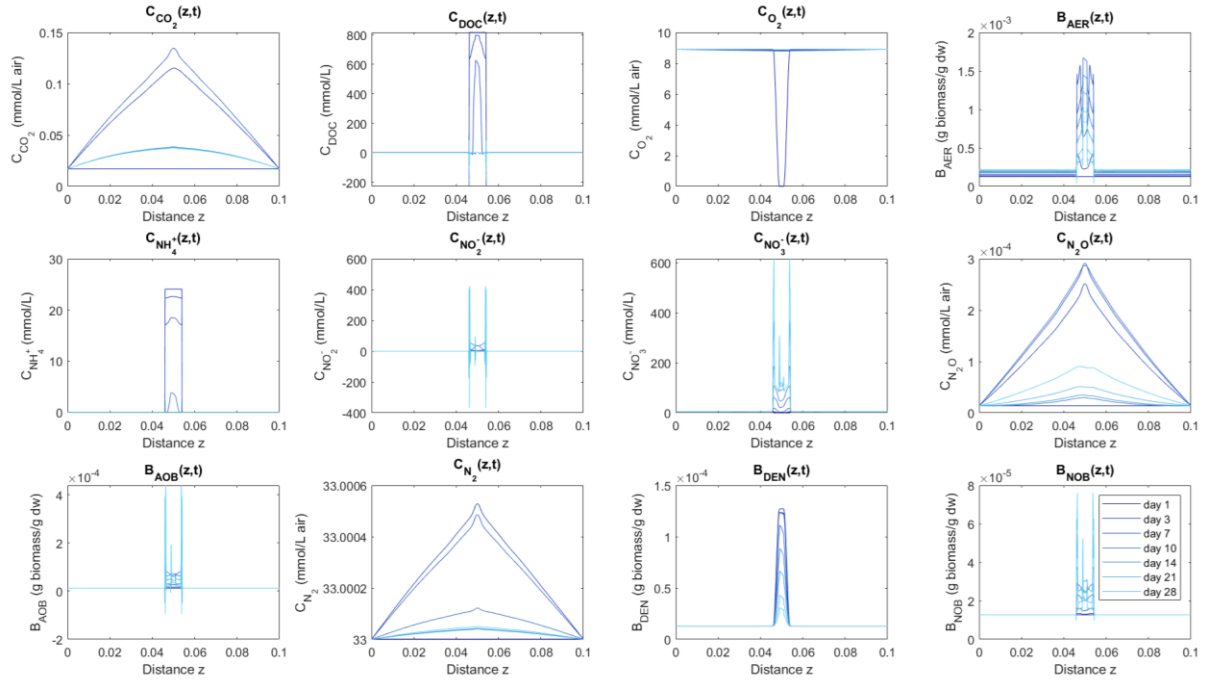

5 Figure S4.2. Simulated concentration profiles of 12 species numerically solved in the model for the -30 hPa treatment, without solute diffusion.

S5. Scenario test: change the small air fraction in the saturated zone

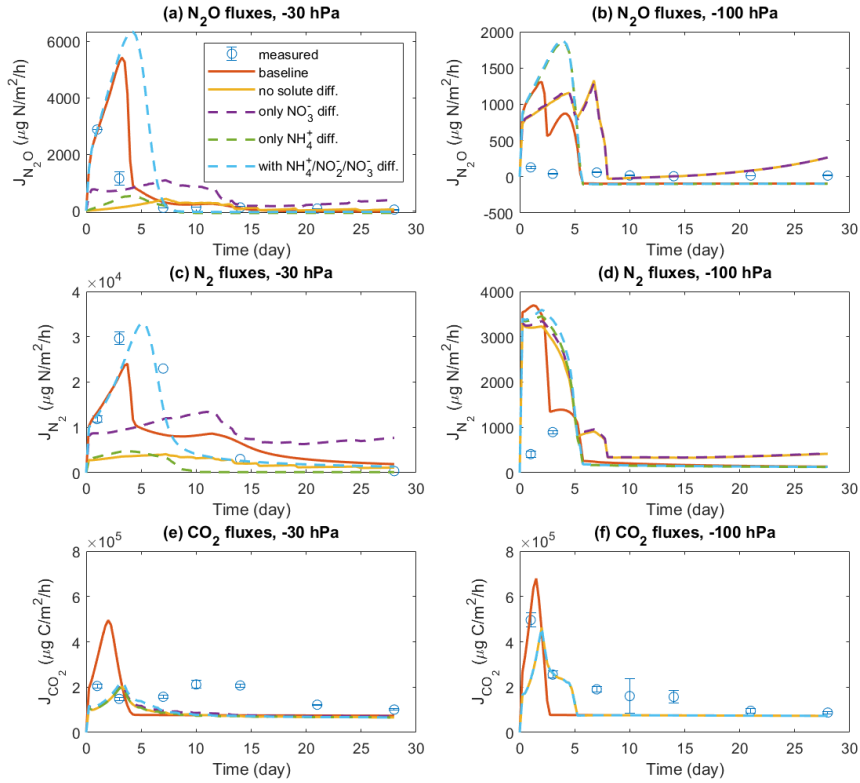

Figure S5.1. Comparison of different scenarios with respect to N<sub>2</sub>O, N<sub>2</sub>, and CO<sub>2</sub> fluxes in the -30 hPa and -100 hPa treatments. In each panel, there are measured data, a baseline simulation where the diffusion of all solutes is included, and four scenario 1~4, where Scenario 1 does not allow any solute diffusion, Scenario 2 allows only NO<sub>3</sub><sup>-</sup> diffusion, Scenario 3 allows only NH<sub>4</sub><sup>+</sup> diffusion, and Scenario 4 allows diffusion of NH<sub>4</sub><sup>+</sup>, NO<sub>3</sub><sup>-</sup>, and NO<sub>2</sub><sup>-</sup>, but not DOC. The small fraction of air porosity in the saturated zone in the -30 hPa treatment was set to 0.001.

5

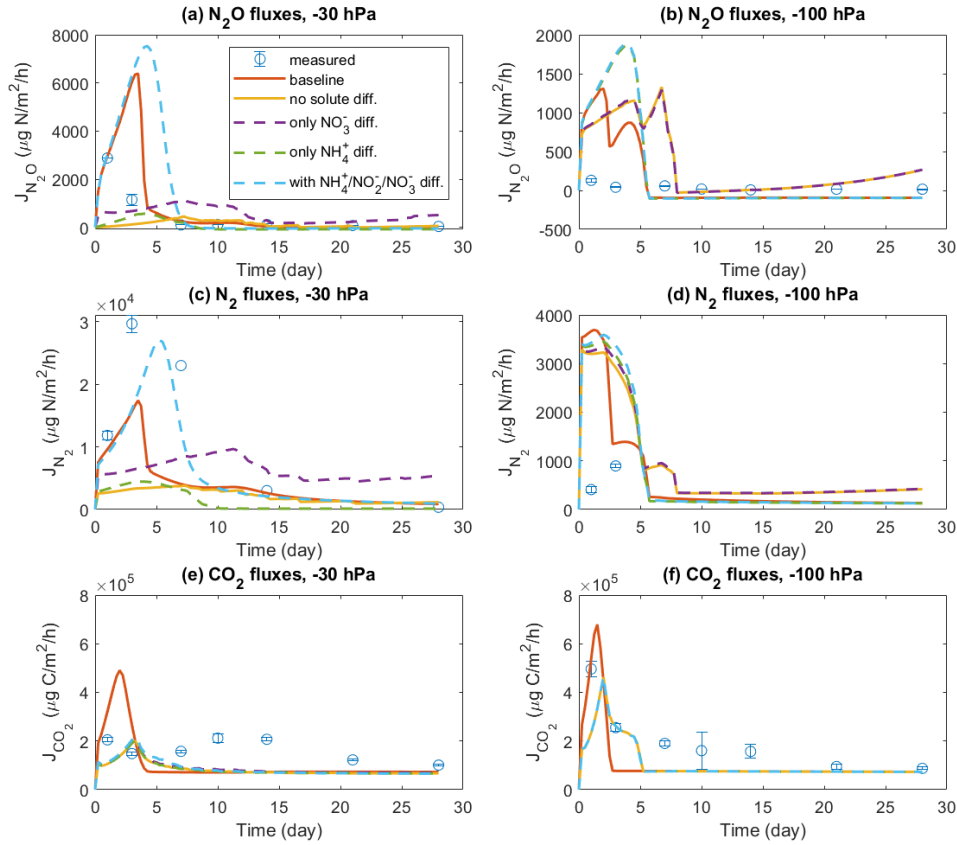

Figure S5.2. Comparison of different scenarios with respect to N<sub>2</sub>O, N<sub>2</sub>, and CO<sub>2</sub> fluxes in the -30 hPa and -100 hPa treatments. In each panel, there are measured data, a baseline simulation where the diffusion of all solutes is included, and four scenario 1~4, where Scenario 1 does not allow any solute diffusion, Scenario 2 allows only NO<sub>3</sub><sup>-</sup> diffusion, Scenario 3 allows only NH<sub>4</sub><sup>+</sup> diffusion, and Scenario 4 allows diffusion of NH<sub>4</sub><sup>+</sup>, NO<sub>3</sub><sup>-</sup>, and NO<sub>2</sub><sup>-</sup>, but not DOC. There was no small fraction of air porosity in the saturated zone in the -30 hPa treatment.

## S6. Model implementation

### S6.1 Calculating dissolved $\text{NH}_4^+$ concentration

5 In the measurement, the total mass of  $\text{NH}_4^+$  in soil sample including the  $\text{NH}_4^+$  dissolved in water and the  $\text{NH}_4^+$  sorbed onto soil were extracted and measured. The mass concentration  $c_{tot}$  (mg/kg dw) was then obtained by dividing the total mass of  $\text{NH}_4^+$  by the mass of dry soil.  $\rho_b$  and  $V$  indicate the bulk soil density and the volume of soil respectively.

$$c_{tot} = \frac{m_{tot}}{\text{mass of dry sample}} = \frac{m_{tot}}{\rho_b V} \quad (1)$$

The total mass of  $\text{NH}_4^+$  in soil sample  $m_{tot}$  (mg) is the sum of  $\text{NH}_4^+$  dissolved in water and  $\text{NH}_4^+$  sorbed onto soil:

$$m_{tot} = m_s + m_w \quad (2)$$

10 The concentration of  $\text{NH}_4^+$  sorbed in soil solids  $c_s$  (mg/kg dw) can be expressed in a Freundlich isotherm (Olesen et al., 1999):

$$c_s = K_F c_w^N \quad (3)$$

where  $c_w$  is the concentration of dissolved  $\text{NH}_4^+$ ,  $K_F$  is the Freundlich distribution coefficient, and  $N$  is the dimensionless Freundlich isotherm exponent.

The mass of  $\text{NH}_4^+$  sorbed in soil  $m_s$  is:

$$\begin{aligned} m_s &= c_s \rho_b V \\ &= K_F c_w^N \rho_b V \end{aligned} \quad (4)$$

The mass of  $\text{NH}_4^+$  dissolved in water  $m_w$  is

$$m_w = c_w \theta_w V \quad (5)$$

15 where  $c_w$  is the concentration of dissolved  $\text{NH}_4^+$  in soil water and  $\theta_w$  is the soil water content.

The mass concentration  $c_{tot}$  obtained in the measurement is

$$\begin{aligned} c_{tot} &= \frac{m_s + m_w}{\rho_b V} \\ &= \frac{K_F c_w^N \rho_b V + c_w \theta_w V}{\rho_b V} \\ &= \frac{K_F c_w^N \rho_b + c_w \theta_w}{\rho_b} \end{aligned} \quad (6)$$

## S6.2 Reaction processes

### a. C mineralization

- Carbon mineralization under aerobic conditions is described by Eq. 1. C mineralization associated with denitrification is also represented in the model (see the following paragraphs).

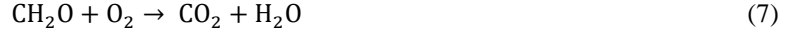

5 The rate of  $\text{CO}_2$  generation,  $S_{\text{CO}_2+,resp}$  (mmol  $\text{CO}_2/\text{L}$  soil/day) in the soil (note: we use the sign +/- following a component in the subscript to indicate the production/consumption of the component, and the same for the following section), in this equation can be written as:

$$S_{\text{CO}_2+,r} = \rho_b \mu_{\text{CO}_2,resp} B_{AER} \frac{[C]}{[C] + kM_{C-\text{CO}_2}} \times \frac{[\text{O}_2]}{[\text{O}_2] + kM_{\text{O}_2-\text{CO}_2}} \quad (8)$$

where  $\mu_{\text{CO}_2,resp}$  (mmol  $\text{CO}_2$  produced/g biomass/day) is the maximum reaction rate, and  $B_{AER}$  (unit: g biomass/g dw) is the microbial biomass responsible for aerobic respiration, and  $\rho_b$  (g dw/ L soil) is the bulk soil density. [C] (mmol  
10 C/L water) and  $[\text{O}_2]$  (mmol  $\text{O}_2/\text{L}$  air) represent available carbon and oxygen at the reactive sites of the enzyme, depending on the diffusion of solutes and gases within the soil medium.

$$[C_{aq}] = C_{aq} \times D_{aq} \times \theta_w^3 \quad (9)$$

$$[\text{O}_2] = \text{O}_2 \times D_g \times \theta_g^{4/3} \quad (10)$$

$D_{aq}$  and  $D_g$  are unitless diffusion coefficients of solute in water and gas in air, respectively (Davidson et al., 2012). The value of  $D_{aq}$  is determined by assuming the extreme condition that  $[C_{aq}] = C_{aq}$  for saturated soil, i.e. all of the soluble substrate is available at the reaction site under this condition. The value of  $D_{gas}$  is determined by another  
15 assumed extreme condition that all of the gas is available at the reaction site in completely dry soil. So, we have

$$D_{aq} = f_{tot}^{-3} \quad (11)$$

$$D_g = f_{tot}^{-4/3} \quad (12)$$

where  $f_{tot}$  is the total soil porosity.

The decomposition of soil organic matter (SOC, gC/g dw), and particulate organic matter in the manure (POC, gC/g dw), are described in first-order kinetics with the decay rate of  $\alpha$  (1/day):

$$S_{SOC-} = \frac{\partial SOC(z, t)}{\partial t} = -\alpha_{SOC} SOC \quad (13)$$

$$S_{POC-} = \frac{\partial POC(z, t)}{\partial t} = -\alpha_{POC} POC \quad (14)$$

DOC production rates ( $S_{DOC+}$ , mmol C produced/L soil/day) from soil organic matter and particulate organic matter  
20 in the manure are expressed as:



$$S_{DOC+,SOC} = -\rho_b S_{SOC-} \times 10^3 / 12 \quad (15)$$

$$S_{DOC+,POC} = -\rho_b S_{POC-} \times 10^3 / 12 \quad (16)$$

Where DOC production rates are calculated from the decomposition rates of SOC and manure POC (g C/g dw/day) and bulk density  $\rho_b$  (g dw/ L soil), along with the g C to mol C conversion factor (1/12) and the mol to mmol conversion factor ( $10^3$ ).

The total consumption rate of DOC by microbial intake and respiration was:

$$S_{DOC-,r} = -\frac{1}{1 - y_{AER}} S_{CO_2+,r} \quad (17)$$

5 where  $y_{AER}$  is the yield coefficient of aerobic heterotrophs.

### b. Nitrification and nitrifier denitrification

Nitrification is the oxidation of  $NH_4^+$  to  $NO_3^-$  via  $NO_2^-$  by autotrophs.

Nitrification:

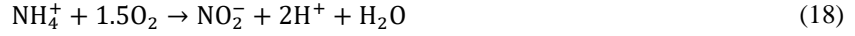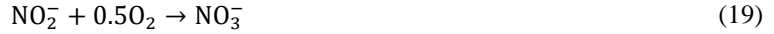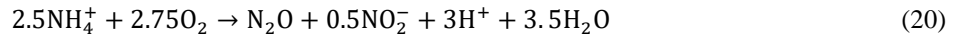

Nitrifier denitrification:

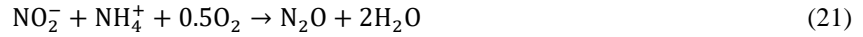

10 Oxygen consumption by nitrifiers is included in these steps. The rate of  $NO_2^-$  production, and  $NO_3^-$  production depends on the availability of parent substrates and  $O_2$ :

$$S_{NO_2^-,+nn} = \rho_b \mu_{NO_2^-,nn} B_{AOB} \frac{[NH_4]}{[NH_4] + kM_{NH_4-NO_2}} \times \frac{[O_2]}{[O_2] + kM_{O_2-NO_2}} \quad (22)$$

$$S_{NO_3^-,+nn} = \rho_b \mu_{NO_3^-,nn} B_{AOB} \frac{[NO_2^-]}{[NO_2^-] + kM_{NO_2-NO_3}} \times \frac{[O_2]}{[O_2] + kM_{O_2-NO_3}} \quad (23)$$

$N_2O$  production from nitrification,

$$S_{N_2O+,nn} = \rho_b \mu_{N_2O+,nn} B_{AOB} \frac{[NH_4]}{[NH_4] + kM_{NH_4-N_2O}} \times \frac{[O_2]}{[O_2] + kM_{O_2-N_2O,nn}} \quad (24)$$

$N_2O$  production from nitrifier denitrification,

$$S_{N_2O+,nd} = \rho_b \mu_{N_2O+,nd} B_{AOB} \frac{[NO_2^-]}{[NO_2^-] + kM_{NO_2-N_2O}} \frac{[NH_4]}{[NH_4] + kM_{NH_4-N_2O}} \times \frac{[O_2]}{[O_2] + kM_{O_2-N_2O,nd}} \times \frac{kI_{N_2O}}{[O_2] + kI_{N_2O,nd}} \quad (25)$$

The total rate of  $\text{NH}_4^+$  consumption for chemical reaction and ammonia oxidizing bacteria (AOB) growth,

$$S_{\text{NH}_4^+,-,n} = -\frac{1}{1-y_{\text{AOB}}}(S_{\text{NO}_2^+,,nn} + 2.5S_{\text{N}_2\text{O}+,nn} + S_{\text{N}_2\text{O}+,nd}) \quad (26)$$

where  $y_{\text{AOB}}$  is the yield coefficient of AOB.

The rate of  $\text{NO}_2^-$  consumption for producing  $\text{NO}_3^-$  and nitrite oxidizing bacteria (NOB) growth:

$$S_{\text{NO}_2^-,-,n} = -\frac{1}{1-y_{\text{NOB}}}S_{\text{NO}_3^+,,n} \quad (27)$$

where  $y_{\text{NOB}}$  is the yield coefficient of NOB.

5  $\text{O}_2$  consumption can be calculated by the production rates of nitrogen oxides in the nitrification process:

$$S_{\text{O}_2,-,n} = -(1.5S_{\text{NO}_2^+,,n} + 0.5S_{\text{NO}_3^+,,n} + 2.75S_{\text{N}_2\text{O}+,nn} + 0.5S_{\text{N}_2\text{O}+,nd}) \quad (28)$$

### c. Denitrification

In the present model, the considered pathways of stepwise denitrification include:

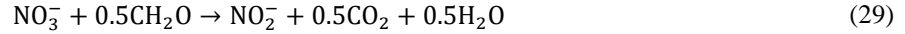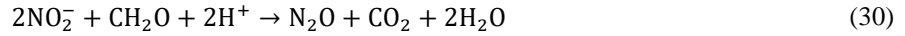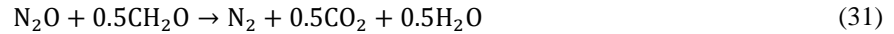

The rates of generation for denitrification products  $\text{NO}_2^-$ ,  $\text{N}_2\text{O}$  and  $\text{N}_2$ , as well as  $\text{CO}_2$ , are written as follows:

$$S_{\text{NO}_2^+,,dn} = \rho_b \mu_{\text{NO}_2^+,,dn} B_{dn} \frac{[\text{NO}_3^-]}{[\text{NO}_3^-] + kM_{\text{NO}_3^- - \text{NO}_2^-}} \times \frac{[\text{C}]}{[\text{C}] + kM_{\text{C} - \text{NO}_2^-}} \times \frac{kI_{\text{NO}_2^-}}{[\text{O}_2] + kI_{\text{NO}_2^+,,dn}} \quad (32)$$

$$S_{\text{N}_2\text{O}+,dn} = \rho_b \mu_{\text{N}_2\text{O}+,dn} B_{dn} \frac{[\text{NO}_2^-]}{[\text{NO}_2^-] + kM_{\text{NO}_3^- - \text{N}_2\text{O}}} \times \frac{[\text{C}]}{[\text{C}] + kM_{\text{C} - \text{N}_2\text{O}}} \times \frac{kI_{\text{N}_2\text{O}}}{[\text{O}_2] + kI_{\text{N}_2\text{O},dn}} \quad (33)$$

$$S_{\text{N}_2+,dn} = \rho_b \mu_{\text{N}_2+,dn} B_{dn} \frac{[\text{N}_2\text{O}]}{[\text{N}_2\text{O}] + kM_{\text{N}_2\text{O}}} \times \frac{[\text{C}]}{[\text{C}] + kM_{\text{C} - \text{N}_2}} \times \frac{kI_{\text{N}_2}}{[\text{O}_2] + kI_{\text{N}_2+,dn}} \quad (34)$$

$$S_{\text{CO}_2+,dn} = 0.5S_{\text{NO}_2^+,,dn} + S_{\text{N}_2\text{O}+,dn} + 0.5S_{\text{N}_2+,dn} \quad (35)$$

The total consumption rate of DOC in denitrification including denitrifier (DEN) growth:

$$S_{\text{DOC}-,dn} = -\frac{1}{1-y_{\text{DEN}}}S_{\text{CO}_2+,dn} \quad (36)$$

10 where  $y_{\text{DEN}}$  is the yield coefficient of denitrifiers.

Given the process reactions, the net rate of change in Eq. (1) of the components listed can be written as follows:

$$\sum S_{\text{DOC}} = -\frac{1}{1-y_{\text{AER}}}S_{\text{CO}_2+,r} - \frac{1}{1-y_{\text{DEN}}}S_{\text{CO}_2+,dn} + S_{\text{DOC}+,soc} + S_{\text{DOC}+,poc} \quad (37)$$

$$\sum S_{CO_2} = S_{CO_2+,r} + S_{CO_2+,dn} \quad (38)$$

$$\sum S_{NO_3^-} = S_{NO_3^-,n} - S_{NO_2^-,dn} \quad (39)$$

$$\sum S_{NO_2^-} = S_{NO_2^-,n} + S_{NO_2^-,dn} + 0.5S_{N_2O+,nn} - \frac{1}{1-y_{NOB}} S_{NO_3^-,n} - S_{N_2O+,nd} - 2S_{N_2O+,dn} \quad (40)$$

$$\sum S_{NH_4^+} = -\frac{1}{1-y_{AOB}} (S_{NO_2^-,n} + 2.5S_{N_2O+,nn} + S_{N_2O+,nd}) \quad (41)$$

$$\sum S_{N_2O} = S_{N_2O+,nn} + S_{N_2O+,nd} + S_{N_2O+,dn} - S_{N_2+,dn} \quad (42)$$

$$\sum S_{N_2} = S_{N_2+,dn} \quad (43)$$

$$\sum S_{O_2} = -(S_{CO_2+,r} + 1.5S_{NO_2^-,n} + 0.5S_{NO_3^-,n} + 2.75S_{N_2O+,nn} + 0.5S_{N_2O+,nd}) \quad (44)$$

Kinetic control of microbial biomass, including nitrifying bacteria and denitrifying bacteria, is described by the Monod equations:

$$\frac{d[B_{AER}]}{dt} = -y_{AER}/f_{Cbio} S_{DOC-,r} \times 10^{-3} \times 12/\rho_b - a_{AER} B_{AER} \quad (45)$$

$$\frac{d[B_{AOB}]}{dt} = -y_{AOB}/f_{Nbio} S_{NH_4^+-,n} \times 10^{-3} \times 14/\rho_b - a_{AOB} B_{AOB} \quad (46)$$

$$\frac{d[B_{NOB}]}{dt} = -y_{NOB}/f_{Nbio} S_{NO_2^-,n} \times 10^{-3} \times 14/\rho_b - a_{NOB} B_{NOB} \quad (47)$$

$$\frac{d[B_{DEN}]}{dt} = -y_{DEN}/f_{Cbio} S_{DOC-,dn} \times 10^{-3} \times 12/\rho_b - a_{DEN} B_{DEN} \quad (48)$$

Where the bacterial growth rates ( $\frac{d[B_{pr}]}{dt}$ , g biomass/g dw/day) are assumed to be proportional to the consumption rates of substrates ( $S_{substrate-pr}$ , mmol C or N/L soil/day), linked by the bulk soil density ( $\rho_b$ , g dw/ L soil), yield coefficients ( $y_{pr}$ , g C/g C or g N/g N), and C or N content in microbial biomass ( $f_{Cbio}$ ,  $f_{Nbio}$ ), along with the mmol to mol conversion factor ( $10^{-3}$ ), the mol C to g C conversion factor (12), and the mol N to g N conversion factor (14).

### S6.3 Initial conditions

#### a. Dissolved organic carbon (DOC)

- 10 • Manure

Manure application rate in the soil core was 3963 g fw/m<sup>2</sup> (39.63 t/ha). Volatile solids in the cattle slurry used in the experiment was 37.14 g VS/kg fw, and by assuming total organic carbon (TOC) accounted for a fraction of 0.42 of

VS (Petersen et al., 2016), the amount of TOC in the applied manure was 61.82 g C/m<sup>2</sup>. We assumed that the fraction of DOC in TOC was 0.5, an intermediate estimate from two studies (Petersen et al., 1996, 2016), and hence the amount of DOC was 30.91 g C/m<sup>2</sup>. We assumed that at the starting point of reactions, manure DOC were concentrated in the zone of manure-saturated zone, i.e. ca. 4 mm from the center to each side (a length of ca. 8 mm), with a constant concentration.

$$C_{DOC,m} = \frac{f_{DOC,m} M_{TOC,m}}{12 \int_{z_1}^{z_2} \theta dz} \quad (49)$$

where  $C_{DOC,m}$  (mol/m<sup>3</sup> or mmol/L) is the concentration of manure DOC,  $M_{TOC,m}$  is the amount of manure TOC in application (g C/m<sup>2</sup>),  $f_{DOC,m}$  is the conversion factor (0.5) from manure TOC to DOC, 1/12 is the conversion factor from g C to mol C, and  $z_1$  and  $z_2$  are the locations of the initial manure DOC zone ( $z_1 = 0.046$  m,  $z_2 = 0.054$  m). The dissolved organic carbon from manure,  $C_{DOC,m}(z)$  is a discretized function over depth, where the value is zero for  $z < z_1$  and  $z > z_2$  and non-zero for  $z_1 < z < z_2$ .

- Soil

We took the average LOI value at 0.01 m and 0.09 m in the control soil core by day 1 as the initial LOI value for the manure treatment. Initial SOC values were estimated from the regression relationship  $SOC = 0.39LOI - 0.28$  (Jensen et al., 2018), which were 0.0169 g C/g dw and 0.0170 g C/g dw for -100 hPa and -30 hPa treatments, respectively. The simulated scenarios represents spring conditions, and it appears that DOC concentrations in the Foulum soil are fairly constant at this time (one year after grassland cultivation) at 20-25 mg C/L (Gjettermann et al., 2008). A conversion factor of  $3.5 \times 10^{-4}$  was estimated as the ratio between dissolved organic C and total soil C for Foulum loamy sand soil so that the estimated DOC concentration became consistent with the reported range. The DOC concentration in the soil was calculated as:

$$C_{DOC,s} = \frac{f_{DOC,s} M_{SOC,s} 10^3 \rho_b}{12 \theta(z)} \quad (50)$$

Where  $C_{DOC,s}$  is the DOC concentration (mmol C/L),  $M_{SOC,s}$  is the SOC content (g C/g dw),  $f_{DOC,m}$  is the conversion factor ( $3.5 \times 10^{-4}$ ) from SOC to DOC,  $\rho_b$  is the bulk density (g dw/L soil) along with the conversion factor  $10^3$  from (g dw/L soil) to (g dw/m<sup>3</sup> soil), 1/12 is the conversion factor from g C to mol C, and  $\theta(z)$  is the volumetric water content at depth  $z$ .

The initial DOC value within the soil was the sum of manure DOC ( $C_{DOC,m}$ ) and soil DOC ( $C_{DOC,s}$ ) as determined by treatment.

## b. NH<sub>4</sub><sup>+</sup>

- Manure

NH<sub>4</sub><sup>+</sup> content in the manure was  $1.23 \times 10^{-3}$  g N/g fw, and with an application rate of 3963 g fw/m<sup>2</sup>, the amount of applied NH<sub>4</sub><sup>+</sup> was 4.87 g N/m<sup>2</sup>. Similar to manure DOC, we assumed that the initial manure NH<sub>4</sub><sup>+</sup> input for model

simulation was concentrated in the zone of manure liquid, ca. 4 mm from the center to each side, with a constant concentration.

$$C_{NH_4,m} = \frac{M_{NH_4,m}}{10^3 \rho_b (z_2 - z_1)} \times \frac{18}{14} \times 10^6 \quad (51)$$

where  $C_{NH_4,m}$  is  $NH_4^+$  content per dry weight (mg  $NH_4^+$ /kg dw),  $M_{NH_4,m}$  is the amount of manure  $NH_4^+$  in application (g N/m<sup>2</sup>),  $\rho_b$  is the bulk density (g dw/L soil) along with the conversion factor  $10^3$  from (g dw/L soil) to (g dw/m<sup>3</sup> soil), and  $(z_2 - z_1)$  is the length of the initial manure  $NH_4^+$  zone (m). We use the dissolved  $NH_4^+$  content instead of  $NH_4^+$ -N in the following calculation, so a factor  $\frac{18}{14} * 10^6$  was used to convert (g N/g dw) to (mg  $NH_4^+$ /kg dw).

The concentration of dissolved  $NH_4^+$  within the manure-concentrated zone was calculated from the Freundlich model (Eq. 6) and the average water content within the initial  $NH_4^+$  zone as follows (see Appendix for details),

$$C_{NH_4,m,aq} = \frac{C_{NH_4,m} \rho_b}{K_F C_{NH_4,m,aq}^{N-1} \rho_b + \theta_{z_1,z_2}} \quad (52)$$

10 where  $C_{NH_4,aq}$  is the dissolved  $NH_4^+$  content (mg  $NH_4^+$ /L),  $C_{NH_4,m}$  is the total  $NH_4^+$  content (mg  $NH_4^+$ /kg dw),  $\rho_b$  is the bulk density (kg dw/L soil),  $K_F$  is the Freundlich distribution coefficient 4.89, and  $N$  is the dimensionless Freundlich isotherm exponent 0.74, adopting the sorption properties of a loamy sand soil in (Olesen et al., 1999).  $\theta_{z_1,z_2}$  is the average water content within the initial  $NH_4^+$  zone. The molar concentration of  $NH_4^+$ -N was calculated by dividing  $C_{NH_4,aq}$  by 18. The dissolved  $NH_4^+$  from manure,  $C_{NH_4,m(aq)}(z)$  is a discretized function over depth, 15 where the value is zero for  $z < z_1$  and  $z > z_2$  and non-zero for  $z_1 < z < z_2$ .

- Soil

The initial  $NH_4^+$  content of the bulk soil in the manure treatment was approximated by the measurements of control treatments at day 1. We took the average values of  $NH_4^+$  content at the depths of 0.01 m and 0.09 m in the control as the initial values of soil  $NH_4^+$ , which were 0.138 mg N/kg and 0.090 mg N/kg for the -100 hPa and -30 hPa 20 treatments respectively. The dissolved soil  $NH_4^+$  content was calculated in the same way as the manure  $NH_4^+$  with consideration of the volumetric water profile  $\theta(z)$ . The initial dissolved  $NH_4^+$  within the soil core was the sum of dissolved  $NH_4^+$  from manure and from soil.

### c. $NO_3^-$

Similar to the calculation of initial DOC and  $NH_4^+$ , we used the average values of  $NO_3^-$  content at the depths of 0.01 25 m and 0.09 m in the control from day 1 as the initial values of soil  $NO_3^-$ . They were 20.54 mg N/kg and 17.86 mg N/kg for the -100 hPa and -30 hPa treatments respectively. We assumed that the soil pore water in the middle of soil core was replaced by the manure slurry in application. In the depth of 0.046 – 0.054 m, the initial  $NO_3^-$  content was assumed to be zero, and soil  $NO_3^-$  existed in the area beyond the central slurry area.

$$C_{NO_3,s} = \frac{M_{NO_3,s} \rho_b 10^{-3} (0.1 - z_2 + z_1)}{14 (\int_0^{z_1} \theta dz + \int_{z_2}^{0.1} \theta dz)} \quad (53)$$

where  $C_{NO_3,s}$  is the dissolved  $NO_3^-$  content (mmol N/L),  $M_{NO_3,s}$  is the  $NO_3^-$  content (mg N/kg dw),  $\rho_b$  is the bulk density (g dw/L soil) along with a factor of  $10^{-3}$  converting (g dw/L soil) to (kg dw/L soil), a conversion factor of 1/14 from mg N to mmol N, and the volumetric water content profile  $\theta(z)$ .

#### 5 d. Particular organic matter (POC) in manure

The amount of manure POC applied was estimated as the difference between TOC and manure DOC, ca. 30.91 g C/m<sup>2</sup>. We assumed manure POC was concentrated in the soil volume dominated by manure, within ca. 1 mm from the center to both sides (a length of 2 mm). The POC content per dry weight is calculated as

$$C_{POC,m} = \frac{M_{POC,m}}{10^3 \rho_b (z_2' - z_1')} \quad (54)$$

where  $C_{POC,m}$  is the manure POC content (g C/g dw),  $M_{POC,m}$  is the amount of manure POC in application (g C/m<sup>2</sup>),  $\rho_b$  is the bulk density (g dw/L soil) with a factor of  $10^3$  converting g dw/L soil to g dw/m<sup>3</sup> soil, and  $(z_2' - z_1')$  is the length of manure POC zone from 0.049 m to 0.051 m. Manure POC content is a piecewise function over depth, where the value is zero for  $z < z_1'$  and  $z > z_2'$  and non-zero for  $z_1' < z < z_2'$  ( $z_1' = 0.049$  m,  $z_2' = 0.051$  m).

#### e. $NO_2^-$

The initial  $NO_2^-$  content within the manure-treated soil profile was assumed to be zero.

#### 15 f. Gases

Four components,  $CO_2$ ,  $O_2$ ,  $N_2O$  and  $N_2$ , in the model were considered in the gas phase. As we had no measurements for the initial gas concentrations, we considered the initial concentrations of the four components equivalent to the ambient atmospheric content at each sampling point while taking into account the exclusion of  $O_2$  in hotspot volumes. The atmospheric  $N_2$  and  $O_2$  were considered to be 0.78 atm and 0.21 atm respectively.  $CO_2$  and  $N_2O$  were considered to be  $4.1 \times 10^{-4}$  atm and  $3.3 \times 10^{-7}$  atm respectively (World Meteorological Organization, 2021).

The gas concentration were calculated by the ideal gas equation:

$$C_{gas} = \frac{n}{V} \cdot 1000 = \frac{P_{gas}}{RT} \cdot 1000 \quad (55)$$

where  $C_{gas}$  is the gas concentration (mmol/L),  $n$  is the molar mass (mol) within a volume of air  $V$  (L),  $P_{gas}$  is the partial pressure of the individual gases (atm),  $R$  is a constant of 0.0821 L·atm/(mol·K),  $T$  is the temperature of 288.15 K, and 1000 is a conversion factor from mol/L to mmol/L.

25 The initial values of  $N_2$ ,  $O_2$ ,  $CO_2$  and  $N_2O$  within the soil air were calculated to be 33.0 mmol/L, 8.9 mmol/L, 0.017 mmol/L, and  $1.4 \times 10^{-5}$  mmol/L. For the two sampling points (at the depths of 0.049 m and 0.051 m) most close to the center, we assumed the  $O_2$  concentration to be zero.

## S7. Parameters

### S7.1 Diffusion coefficients

- Base diffusion coefficients

5 Base ion diffusion coefficients for most components refers to (Haynes, 2014) at 25 °C, and gas diffusion coefficients at 20 °C. For N<sub>2</sub>O, diffusion coefficients at 15 °C were calculated according to (Massman, 1998).

Table S7.1 Base diffusion coefficients

| Component                    | Phase | D (m <sup>2</sup> /d) | Temperature | Reference       |
|------------------------------|-------|-----------------------|-------------|-----------------|
| NO <sub>2</sub> <sup>-</sup> | water | 1.65E-04              | 298.15      | (Haynes, 2014)  |
| NO <sub>3</sub> <sup>-</sup> | water | 1.64E-04              | 298.15      | (Haynes, 2014)  |
| NH <sub>4</sub> <sup>+</sup> | water | 1.69E-04              | 298.15      | (Haynes, 2014)  |
| DOC                          | water | 8.38E-05              | 298.15      | *               |
| N <sub>2</sub> O             | air   | 1.37                  | 288.15 K    | (Massman, 1998) |
| N <sub>2</sub>               | air   | 1.75                  | 293.15 K    | (Haynes, 2014)  |
| CO <sub>2</sub>              | air   | 1.31                  | 293.15 K    | (Haynes, 2014)  |
| O <sub>2</sub>               | air   | 1.75                  | 293.15 K    | (Haynes, 2014)  |

\*The value of DOC were calculated based on the mean value of diffusion coefficients of acetate, butyrate and propionate (Haynes, 2014). The three components are significant components of water-soluble C in the slurries (Paul and Beauchamp, 1989).

10

- Diffusion coefficients of liquid and gas at 15 °C (D<sub>0</sub>)

The diffusion coefficients of DOC, NO<sub>2</sub><sup>-</sup>, NO<sub>3</sub><sup>-</sup>, and NH<sub>4</sub><sup>+</sup> in soil water were adjusted for temperature from the equation of Stokes-Einstein:

$$\frac{D_{T1}}{D_{T2}} = \frac{T_1}{T_2} \times \frac{\mu T_2}{\mu T_1}$$

15

The diffusion coefficients of N<sub>2</sub>O, N<sub>2</sub>, CO<sub>2</sub>, and O<sub>2</sub> in soil air were adjusted for temperature (Gilliland, 1934):

$$\frac{D_{T1}}{D_{T2}} = \left(\frac{T_1}{T_2}\right)^{1.5}$$

Table S7.2 Adjusted base diffusion coefficients at 15 °C (288.15 K)

| Component                    | Phase | D <sub>o</sub> (m <sup>2</sup> /d) | Temperature |
|------------------------------|-------|------------------------------------|-------------|
| NO <sub>2</sub> <sup>-</sup> | water | 1.25E-04                           | 288.15 K    |
| NO <sub>3</sub> <sup>-</sup> | water | 1.24E-04                           | 288.15 K    |
| NH <sub>4</sub> <sup>+</sup> | water | 1.28E-04                           | 288.15 K    |
| DOC                          | water | 6.34E-05                           | 288.15 K    |
| N <sub>2</sub> O             | air   | 1.37                               | 288.15 K    |
| N <sub>2</sub>               | air   | 1.70                               | 288.15 K    |
| CO <sub>2</sub>              | air   | 1.35                               | 288.15 K    |
| O <sub>2</sub>               | air   | 1.70                               | 288.15 K    |

- The effective diffusion coefficients were expressed as:

$$D_{\text{eff, aq}} = \theta_{\text{aq}}^3 D_o \text{ (in water phase)}$$

$$D_{\text{eff, g}} = \theta_g^{4/3} D_o \text{ (in gas phase)}$$

## 5 S7.2 Biotic parameters

In the model, the maximum potential reaction rate regarding the soil  $V_{\text{max}}$  (mmol/g dw/day) is expressed as  $\mu_{\text{max}} * B$ , where  $\mu_{\text{max}}$  (mmol/g biomass/day) is the maximum reaction rate regarding the microbial biomass, and B (g biomass/g dw) is the microbial biomass content in the -100 hPa soil. We determined the value ranges of  $V_{\text{max}}$  by looking at relevant experimental studies and then determined the value ranges of  $\mu_{\text{max}}$  by dividing the  $V_{\text{max}}$  by the basal biomass of the involved microbes in the soil.  $\mu_{\text{max}}$  was used as the model parameter and the relevant literature considered for  $V_{\text{max}}$  was shown in the sources and notes in Tables 7.3 and 7.4. The half-saturation constant for solute components represents the concentration in water (mmol/L water) and the half-saturation constant for gas components represents the concentration in air (mmol/L air).

Table 7.3. Parameters with fixed values in the model

| Symbols                                | Descriptions                                                                                                          | Units  | Fixed values | Lower limits | Upper limits | Sources and notes      |
|----------------------------------------|-----------------------------------------------------------------------------------------------------------------------|--------|--------------|--------------|--------------|------------------------|
| $k_{\text{NH}_4\text{-NO}_2\text{-n}}$ | Half-saturation constant of NH <sub>4</sub> <sup>+</sup> for NO <sub>2</sub> <sup>-</sup> production in nitrification | mmol/L | 0.001        | 0.001        | 0.04         | (Auyeung et al., 2015) |



|                        |                                                                                         |        |       |       |       |                            |
|------------------------|-----------------------------------------------------------------------------------------|--------|-------|-------|-------|----------------------------|
| $k_{O_2_{NO_2_n}}$     | Half-saturation constant of $O_2$ for $NO_2^-$ production in nitrification              | mmol/L | 0.07  | 0.01  | 2     | This study                 |
| $k_{O_2_{NO_3_n}}$     | Half-saturation constant of $O_2$ for $NO_3^-$ production in nitrification              | mmol/L | 0.1   | 0.01  | 3     | This study                 |
| $k_{NH_4_{N_2O_n}}$    | Half-saturation constant of $NH_4^+$ for $N_2O$ production in nitrification             | mmol/L | 0.001 | 0.001 | 0.04  | This study                 |
| $k_{O_2_{N_2O_n}}$     | Half-saturation constant of $O_2$ for $N_2O$ production in nitrification                | mmol/L | 0.07  | 0.01  | 2     | This study                 |
| $k_{NH_4_{N_2O_{nd}}}$ | Half-saturation constant of $NH_4^+$ for $N_2O$ production in nitrifier denitrification | mmol/L | 0.001 | 0.001 | 0.04  | This study                 |
| $k_{O_2_{N_2O_{nd}}}$  | Half-saturation constant of $O_2$ for $N_2O$ production in nitrifier denitrification    | mmol/L | 0.01  | 0.01  | 2     | This study                 |
| $k_{N_2O_{N_2_{dn}}}$  | Half-saturation constant of $N_2O$ for $N_2$ production in denitrification              | mmol/L | 5E-6  | 1E-06 | 0.001 | (Betlach and Tiedje, 1981) |
| $k_I_{NO_2_{dn}}$      | Inhibition constant of $O_2$ for $NO_2^-$ production in denitrification                 | mmol/L | 0.1   | 0.01  | 2     | This study                 |
| $k_I_{N_2O_{dn}}$      | Inhibition constant of $O_2$ for $N_2O$ production in denitrification                   | mmol/L | 0.04  | 0.01  | 2     | This study                 |
| $k_I_{N_2O_{nd}}$      | Inhibition constant of $O_2$ for $N_2O$ production in nitrifier denitrification         | mmol/L | 0.04  | 0.01  | 2     | This study                 |
| $k_I_{N_2_{dn}}$       | Inhibition constant of $O_2$ for $N_2$ production in denitrification                    | mmol/L | 0.04  | 0.01  | 2     | This study                 |

|                |                                        |               |       |       |       |                       |
|----------------|----------------------------------------|---------------|-------|-------|-------|-----------------------|
| $y_{AER}$      | Yield coefficient for aerobic bacteria | g C/g C       | 0.3   | 0.15  | 0.6   | This study            |
| $y_{AOB}$      | Yield coefficient for AOB              | g N/g N       | 0.013 | 0.007 | 0.026 | (Chen et al., 2019)   |
| $y_{NOB}$      | Yield coefficient for NOB              | g N/g N       | 0.004 | 0.002 | 0.008 | (Chen et al., 2019)   |
| $y_{DEN}$      | Yield coefficient for denitrifiers     | g C/g C       | 0.3   | 0.15  | 0.6   | This study            |
| $a_{AER}$      | Decay rate for aerobic bacteria        | 1/day         | 0.1   | 0.05  | 0.2   | This study            |
| $a_{AOB}$      | Decay rate for AOB                     | 1/day         | 0.096 | 0.05  | 0.19  | (Chen et al., 2019)   |
| $a_{NOB}$      | Decay rate for NOB                     | 1/day         | 0.096 | 0.05  | 0.19  | (Chen et al., 2019)   |
| $a_{DEN}$      | Decay rate for denitrifiers            | 1/day         | 0.1   | 0.05  | 0.2   | This study            |
| $\alpha_{SOC}$ | Decomposition rate of SOC              | 1/day         | 0.001 | -     | -     | This study            |
| $\alpha_{POC}$ | Decomposition rate of manure POC       | 1/day         | 0.01  | -     | -     | This study            |
| $f_{Cbio}$     | C content in microbial biomass         | g C/g biomass | 0.53  | -     | -     | (Khalil et al., 2005) |
| $f_{Nbio}$     | N content in microbial biomass         | g N/g biomass | 0.066 | -     | -     | This study            |

Note: blank values indicate the parameter value was not changed to check the sensitivity. The value of  $\alpha_{SOC}$  was set as 0.001 1/day, so that the amount of degraded SOC following the first-order kinetics ( $6.57 \times 10^4$  mg C/m<sup>2</sup>) was comparable to the cumulative CO<sub>2</sub>-C emissions from control treatments ( $5.11 \times 10^4$  -  $5.26 \times 10^4$  mg C/m<sup>2</sup>) during incubation. The value of  $\alpha_{POC}$  took ten times the value of  $\alpha_{SOC}$ .  $f_{Nbio}$  was estimated from  $f_{Cbio}$  by assuming a C/N ratio of 8.

5

Table 7.4. Parameters used in mode calibration and calibrated values.

| Symbols | Descriptions | Units | Calibrated values | Lower limits | Upper limits | Sources and notes |
|---------|--------------|-------|-------------------|--------------|--------------|-------------------|
|---------|--------------|-------|-------------------|--------------|--------------|-------------------|

|                    |                                                                                                                         |        |       |       |      |                                               |
|--------------------|-------------------------------------------------------------------------------------------------------------------------|--------|-------|-------|------|-----------------------------------------------|
| $k_{C\_CO2\_r}$    | Half-saturation constant of DOC for CO <sub>2</sub> production in aerobic respiration                                   | mmol/L | 4.07  | 0.5   | 10   | This study                                    |
| $k_{O2\_CO2\_r}$   | Half-saturation constant of O <sub>2</sub> for CO <sub>2</sub> production in aerobic respiration                        | mmol/L | 0.86  | 0.01  | 2    | This study                                    |
| $k_{NO2\_NO3\_n}$  | Half-saturation constant of NO <sub>2</sub> <sup>-</sup> for NO <sub>3</sub> <sup>-</sup> production in nitrification   | mmol/L | 0.47  | 0.009 | 0.54 | (Nowka et al., 2015)                          |
| $k_{NO2\_N2O\_nd}$ | Half-saturation constant of NO <sub>2</sub> <sup>-</sup> for N <sub>2</sub> O production in nitrifier denitrification   | mmol/L | 0.028 | 0.001 | 0.05 | This study                                    |
| $k_{NO3\_NO2\_dn}$ | Half-saturation constant of NO <sub>3</sub> <sup>-</sup> for NO <sub>2</sub> <sup>-</sup> production in denitrification | mmol/L | 3.50  | 0.001 | 3.5  | (Betlach and Tiedje, 1981; Kohl et al., 1976) |
| $k_{C\_NO2\_dn}$   | Half-saturation constant of DOC for NO <sub>2</sub> <sup>-</sup> production in denitrification                          | mmol/L | 4.62  | 1     | 10   | This study                                    |
| $k_{NO2\_N2O\_dn}$ | Half-saturation constant of NO <sub>2</sub> <sup>-</sup> for N <sub>2</sub> O production in denitrification             | mmol/L | 0.001 | 0.001 | 0.05 | (Betlach and Tiedje, 1981)                    |
| $k_{C\_N2O\_dn}$   | Half-saturation constant of DOC for N <sub>2</sub> O production in denitrification                                      | mmol/L | 8.10  | 0.5   | 10   | This study                                    |
| $k_{C\_N2\_dn}$    | Half-saturation constant of DOC for                                                                                     | mmol/L | 0.5   | 0.5   | 10   | This study                                    |

|                | N <sub>2</sub> production in denitrification                                    |                                                          |       |        |          |                                                    |  |
|----------------|---------------------------------------------------------------------------------|----------------------------------------------------------|-------|--------|----------|----------------------------------------------------|--|
| $\mu_{CO2_r}$  | Maximum velocity for CO <sub>2</sub> production in aerobic respiration          | mmol CO <sub>2</sub> produced/g biomass/day              | 202.8 | 585.4  | 2.93E+05 | (Eberwein et al., 2015)                            |  |
| $\mu_{NO2_n}$  | Maximum velocity for NO <sub>2</sub> <sup>-</sup> production in nitrification   | mmol NO <sub>2</sub> <sup>-</sup> produced/g biomass/day | 115.2 | 37.9   | 291      | (Højberg et al., 1996)                             |  |
| $\mu_{NO3_n}$  | Maximum velocity for NO <sub>3</sub> <sup>-</sup> production in nitrification   | mmol NO <sub>3</sub> <sup>-</sup> produced/g biomass/day | 159.6 | 1870   | 1.43E+04 | (Højberg et al., 1996)                             |  |
| $\mu_{N2O_n}$  | Maximum velocity for N <sub>2</sub> O production in nitrification               | mmol N <sub>2</sub> O produced/g biomass/day             | 1.89  | 6.3    | 253      | This study                                         |  |
| $\mu_{N2O_nd}$ | Maximum velocity for N <sub>2</sub> O production in nitrifier denitrification   | mmol N <sub>2</sub> O produced/g biomass/day             | 12    | 6.3    | 253      | This study                                         |  |
| $\mu_{NO2_dn}$ | Maximum velocity for NO <sub>2</sub> <sup>-</sup> production in denitrification | mmol NO <sub>2</sub> <sup>-</sup> produced/g biomass/day | 100   | 1252.2 | 4174     | (Højberg et al., 1996)                             |  |
| $\mu_{N2O_dn}$ | Maximum velocity for N <sub>2</sub> O production in denitrification             | mmol N <sub>2</sub> O produced/g biomass/day             | 45.8  | 26.1   | 1043     | (Holtan-Hartwig et al., 2000; Tiedje et al., 1982) |  |
| $\mu_{N2_dn}$  | Maximum velocity for N <sub>2</sub> production in denitrification               | mmol N <sub>2</sub> produced/g biomass/day               | 48.7  | 26.1   | 261      | (Højberg et al., 1996)                             |  |

## References

- Auyeung, D. S. N., Martiny, J. B. H. and Dukes, J. S.: Nitrification kinetics and ammonia-oxidizing community respond to warming and altered precipitation, *Ecosphere*, 6, 1–17, doi:10.1890/ES14-00481.1, 2015.
- 5 Betlach, M. R. and Tiedje, J. M.: Kinetic explanation for accumulation of nitrite, nitric oxide, and nitrous oxide

- during bacterial denitrification, *Appl. Environ. Microbiol.*, 42, 1074–1084, doi:10.1128/aem.42.6.1074-1084.1981, 1981.
- Chen, X., Ni, B. J. and Sin, G.: Nitrous oxide production in autotrophic nitrogen removal granular sludge: a modeling study, *Biotechnol. Bioeng.*, 116, 1280–1291, doi:10.1002/bit.26937, 2019.
- 5 Davidson, E. A., Samanta, S., Caramori, S. S. and Savage, K.: The Dual Arrhenius and Michaelis – Menten kinetics model for decomposition of soil organic matter at hourly to seasonal time scales, *Glob. Chang. Biol.*, 18, 371–384, doi:10.1111/j.1365-2486.2011.02546.x, 2012.
- Eberwein, J. R., Oikawa, P. Y., Allsman, L. A. and Jenerette, G. D.: Carbon availability regulates soil respiration response to nitrogen and temperature, *Soil Biol. Biochem.*, 88, 158–164, doi:10.1016/J.SOILBIO.2015.05.014, 10 2015.
- Gilliland, E. R.: Diffusion coefficients in gaseous systems, *Ind. Eng. Chem.*, 26, 681–685, doi:10.1021/IE50294A020/ASSET/IE50294A020.FP.PNG\_V03, 1934.
- Gjettermann, B., Styczen, M., Hansen, H. C. B., Vinther, F. P. and Hansen, S.: Challenges in modelling dissolved organic matter dynamics in agricultural soil using DAISY, *Soil Biol. Biochem.*, 40, 1506–1518, 15 doi:10.1016/J.SOILBIO.2008.01.005, 2008.
- Haynes, W. M.: *CRC handbook of chemistry and physics*, CRC press., 2014.
- Højberg, O., Binnerup, S. J. and Sørensen, J.: Potential rates of ammonium oxidation, nitrite oxidation, nitrate reduction and denitrification in the young barley rhizosphere, *Soil Biol. Biochem.*, 28, 47–54, doi:10.1016/0038-0717(95)00119-0, 1996.
- 20 Holtan-Hartwig, L., Dörsch, P. and Bakken, L. R.: Comparison of denitrifying communities in organic soils: kinetics of  $\text{NO}_3^-$  and  $\text{N}_2\text{O}$  reduction, *Soil Biol. Biochem.*, 32, 833–843, doi:10.1016/S0038-0717(99)00213-8, 2000.
- Jensen, J. L., Christensen, B. T., Schjøning, P., Watts, C. W. and Munkholm, L. J.: Converting loss-on-ignition to organic carbon content in arable topsoil: pitfalls and proposed procedure, *Eur. J. Soil Sci.*, 69, 604–612, doi:10.1111/EJSS.12558, 2018.
- 25 Khalil, K., Renault, P., Guerin, N. and Mary, B.: Modelling denitrification including the dynamics of denitrifiers and their progressive ability to reduce nitrous oxide: comparison with batch experiments, *Eur. J. Soil Sci.*, 56, 491–504, doi:10.1111/j.1365-2389.2004.00681.x, 2005.
- Kohl, D. H., Vithayathil, F., Whitlow, P., Shearer, G. and Chien, S. H.: Denitrification kinetics in soil systems: the significance of good fits of data to mathematical forms, *Soil Sci. Soc. Am. J.*, 40, 249–253, 30 doi:10.2136/sssaj1976.03615995004000020018x, 1976.
- Massman, W. J.: A review of the molecular diffusivities of  $\text{H}_2\text{O}$ ,  $\text{CO}_2$ ,  $\text{CH}_4$ ,  $\text{CO}$ ,  $\text{O}_3$ ,  $\text{SO}_2$ ,  $\text{NH}_3$ ,  $\text{N}_2\text{O}$ ,  $\text{NO}$ , and  $\text{NO}_2$  in air,  $\text{O}_2$  and  $\text{N}_2$  near STP, in *Atmospheric Environment*, vol. 32, pp. 1111–1127, Pergamon., 1998.
- Millington, R. J.: Gas diffusion in porous media, *Science (80-. )*, 130, 100–102, doi:10.1126/science.130.3367.100.b, 1959.
- 35 Nowka, B., Daims, H. and Spieck, E.: Comparison of oxidation kinetics of nitrite-oxidizing bacteria: Nitrite availability as a key factor in niche differentiation, *Appl. Environ. Microbiol.*, 81, 745–753, doi:10.1128/AEM.02734-14, 2015.

Olesen, T., Moldrup, P. and Gamst, J.: Solute diffusion and adsorption in six soils along a soil texture gradient, *Soil Sci. Soc. Am. J.*, 63, 519–524, doi:10.2136/sssaj1999.03615995006300030014x, 1999.

Paul, J. W. and Beauchamp, E. G.: Effect of carbon constituents in manure on denitrification in soil, *Can. J. Soil Sci.*, 69, 49–61, doi:10.4141/cjss89-006, 1989.

5 Petersen, S. O., Nielsen, T. H., Frostegård, Å. and Olesen, T.: O<sub>2</sub> uptake, C metabolism and denitrification associated with manure hot-spots, *Soil Biol. Biochem.*, 28, 341–349, doi:10.1016/0038-0717(95)00150-6, 1996.

Petersen, S. O., Olsen, A. B., Elsgaard, L., Triolo, J. M. and Sommer, S. G.: Estimation of methane emissions from slurry pits below pig and cattle confinements, *PLoS One*, 11, 1–16, doi:10.1371/journal.pone.0160968, 2016.

10 Tiedje, J. M., Sextone, A. J., Myrold, D. D., Robinson, J. A. and Denitrifica, J. A.: Denitrification: ecological niches, competition and survival I, *Antonie Van Leeuwenhoek*, 48, 569–583, 1982.

World Meteorological Organization: WMO Greenhouse gas bulletin: the state of greenhouse gases in the atmosphere based on global observations through 2020, [online] Available from:

[https://library.wmo.int/index.php?lvl=notice\\_display&id=21975#.YgFFTrrMJJaQ](https://library.wmo.int/index.php?lvl=notice_display&id=21975#.YgFFTrrMJJaQ) (Accessed 7 February 2022), 2021.

15
